# Supplementary material
Source: Springer Nature journal article supplement (https://www.springermedizin.de/resource/supplementary/13256_2009_1638_MOESM1_ESM.pdf/9648030)

HF-CVVH start

ECMO start

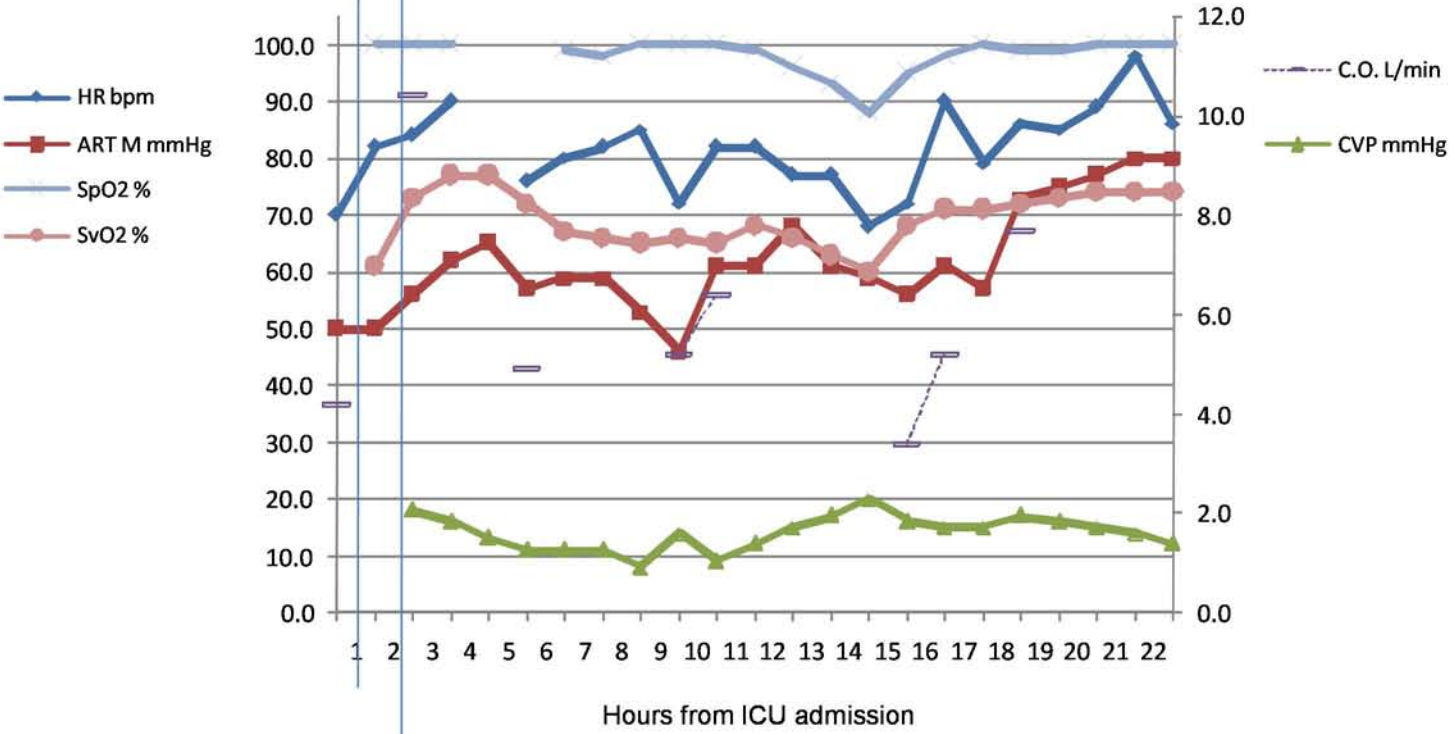

Supplement: MOESM1 [file 9648030]
